# Supplementary material for: Life Cycle Dominates the Volatilome Character of Dimorphic Fungus Coccidioides spp
Source: PubMed Central journal article supplement (PMC8546678; doi:10.1128/msphere.00040-21), 2021-04-14
Supplement: msphere.00040-21-st002.pdf [file msphere.00040-21-st002.pdf]

**Table S2.**

| <b>Strain</b>                        | <b>Mycelia (n = 224)</b> | <b>Spherule (n = 272)</b> |
|--------------------------------------|--------------------------|---------------------------|
| <b><i>C. posadasii</i> (n = 291)</b> |                          |                           |
| Silveira*                            | 51                       | 61                        |
| B3221                                | 56                       | 122                       |
| B3222                                | 55                       | 80                        |
| RMSCC2343                            | 69                       | 80                        |
| RMSCC3506                            | 51                       | 77                        |
| GT-166                               | 36                       | 107                       |
| <b><i>C. immitis</i> (n = 309)</b>   |                          |                           |
| RS*                                  | 71                       | 105                       |
| RMSCC2395                            | 81                       | 42                        |
| RMSCC3505                            | 63                       | 96                        |
| RMSCC2006                            | 59                       | 53                        |
| RMSCC2009                            | 54                       | 68                        |
| RMSCC2010                            | 61                       | 75                        |
