# Supplementary material for: Life Cycle Dominates the Volatilome Character of Dimorphic Fungus Coccidioides spp
Source: PubMed Central journal article supplement (PMC8546678; doi:10.1128/msphere.00040-21), 2021-04-14
Supplement: msphere.00040-21-st003.pdf [file msphere.00040-21-st003.pdf]

Table S3.

| <b>AUTOSAMPLER METHOD</b>          |                                                                                                   |
|------------------------------------|---------------------------------------------------------------------------------------------------|
| Instrument description             | Gerstel® MPS Pro®                                                                                 |
| Software description               | Gerstel® Maestro® (version 1.5.3.2)                                                               |
| <b>Sampling Parameters</b>         |                                                                                                   |
| Cooled tray temperature            | 4 °C                                                                                              |
| Solid phase microextraction (SPME) | Manufacturer: Supelco®<br>Fiber type: PDMS/CAR/DVB (1 cm; 50/30 µm)                               |
| Incubation time                    | 5 min                                                                                             |
| Agitator parameters, incubation    | Temperature: 50 °C<br>On time: 10 s<br>Off time: 1 s<br>Speed: 600 rpm                            |
| Agitation, sampling                | On                                                                                                |
| Vial penetration                   | 21 mm                                                                                             |
| Extraction time                    | 10 min                                                                                            |
| Injection penetration              | 67 mm                                                                                             |
| Desorption time                    | 180 s                                                                                             |
| <b>Inlet (CIS) Parameters</b>      |                                                                                                   |
| Initial temperature                | 250 °C                                                                                            |
| Equilibrium time                   | 0.05 min                                                                                          |
| Initial time                       | 0.10 min                                                                                          |
| Ramp rate                          | 12 °C·s <sup>-1</sup>                                                                             |
| End temperature                    | 250 °C                                                                                            |
| Hold time                          | 10.5 min                                                                                          |
| <b>GC×GC METHOD</b>                |                                                                                                   |
| Instrument description             | Agilent® 7890B                                                                                    |
| Column configuration               | Column 1: Rxi®-624Sil MS, 60 m × 0.25 mm × 1.4 µm<br>Column 2: Stabilwax®, 1 m × 0.25 mm × 0.5 µm |
| Carrier gas                        | Helium, 2 mL·min <sup>-1</sup> (constant)                                                         |
| Front inlet type                   | Gerstel®                                                                                          |
| Front inlet mode                   | Splitless                                                                                         |
| Front inlet septum purge flow      | 1 mL·min <sup>-1</sup>                                                                            |
| Front inlet septum purge time      | 300 s                                                                                             |
| Front inlet purge flow             | 50 mL·min <sup>-1</sup>                                                                           |
| Front inlet total purge flow       | 52 mL·min <sup>-1</sup>                                                                           |
| Oven equilibration time            | 5 s                                                                                               |
| Primary oven temperature ramp      | Initial temperature: 35 °C<br>Initial time: 0.5 min<br>Ramp rate: 5 C·min <sup>-1</sup>           |

|                                                   |                                                                                                                                                                                                     |
|---------------------------------------------------|-----------------------------------------------------------------------------------------------------------------------------------------------------------------------------------------------------|
|                                                   | Final temperature: 230 °C<br>Hold time: 5 min                                                                                                                                                       |
| Secondary oven temperature offset                 | +5 °C (relative to primary oven)                                                                                                                                                                    |
| Modulator temperature offset                      | +15 °C (relative to secondary oven)                                                                                                                                                                 |
| Modulation timing                                 | Modulation period: 2.00 s<br>Hot pulse time: 0.50 s<br>Cold pulse time: 0.50 s                                                                                                                      |
| Transfer line temperature                         | 250 °C                                                                                                                                                                                              |
| <b>MASS SPECTROMETRY METHOD</b>                   |                                                                                                                                                                                                     |
| Instrument description                            | LECO® Pegasus® 4D                                                                                                                                                                                   |
| Use GC method total time for MS method total time | Yes                                                                                                                                                                                                 |
| Acquisition delay                                 | 180 s                                                                                                                                                                                               |
| Filament active time                              | 180 s to end of run                                                                                                                                                                                 |
| Start mass/End mass                               | 35/400                                                                                                                                                                                              |
| Acquisition rate                                  | 100 spectra·s <sup>-1</sup>                                                                                                                                                                         |
| Optimized voltage offset                          | +50 V                                                                                                                                                                                               |
| Electron energy                                   | -70 eV                                                                                                                                                                                              |
| Ion source temperature                            | 250 °C                                                                                                                                                                                              |
| <b>DATA PROCESSING METHOD</b>                     |                                                                                                                                                                                                     |
| Software description                              | LECO® ChromaTOF® and<br>Statistical Compare (version<br>4.71.0.0)                                                                                                                                   |
| Baseline tracking/Offset                          | Entire run/0.5 (through middle of noise)                                                                                                                                                            |
| Data points averaged for smoothing                | Auto                                                                                                                                                                                                |
| First dimension peak width                        | 12 slices                                                                                                                                                                                           |
| Mass spectral match required to combine           | 600                                                                                                                                                                                                 |
| Second dimension peak width                       | 0.15                                                                                                                                                                                                |
| Min. subpeak signal-to-noise (S/N) for            | 6                                                                                                                                                                                                   |
| Integration approach                              | Traditional                                                                                                                                                                                         |
| Peak finding                                      | S/N: 50<br>Number of apexing masses: 2                                                                                                                                                              |
| Mass spec libraries for searching                 | NIST 2011                                                                                                                                                                                           |
| Mass to use for area/height calculation           | Unique mass                                                                                                                                                                                         |
| Alignment analyte match criteria                  | Spectral match mass threshold: 10<br>Minimum spectral similarity match: 600<br>Max. number of modulation periods apart: 3<br>Max. retention time difference (s): 0.2<br>S/N for second peak find: 5 |
| Criteria for inclusion of analytes                | Min. number of samples that contain analyte: 1                                                                                                                                                      |
